# Supplementary material for: Cerebral malaria is associated with differential cytoadherence to brain endothelial cells
Source: PubMed Central journal article supplement (PMC6365927; doi:10.15252/emmm.201809164), 2019-01-04
Supplement: EMMM-11-e9164-s001.pdf [file EMMM-11-e9164-s001.pdf]

## Appendix

### Cerebral malaria is associated with differential cytoadherence to brain endothelial cells.

Table of contents

**Appendix Table S1.** In silico characterisation of *var* gene primers.

**Appendix Table S2.** Correlation between binding of the clinical isolates to HBMEC or HDMEC and transcript levels of *var* gene domains.

**Appendix Figure S1.** Characterisation of HBMEC and HDMEC and expression of ICAM-1, EPCR and CD36 at number of passages.

**Appendix Figure S2.** Cytoadherence of IT4var19 and three patient isolates to HBMEC in presence of human serum.

**Appendix Figure S3.** Inhibition of cytoadherence of IE from CM and UM cases to HBMEC and HDMEC by combined  $\alpha$ ICAM-1 antibody and rEPCR.



| Primer name<br>(Target domain type) | Forward primers<br>5'-3'<br><br>Mixed to a final total primer concentration of 20 µM                                                                                       | Reverse primers<br>5'-3'<br><br>Mixed to a final total primer concentration of 20 µM                                                                         | Amplicon size<br><br>Median (Min - Max)<br>bp | Coverage<br><br>Number of sequences amplified with intended domain class / number of sequences with intended domain class (%) | Specificity<br><br>Number of sequences amplified with intended domain class / number of domain sequences amplified (%)<br><br>Specificity graphic                                                                                                                       |
|-------------------------------------|----------------------------------------------------------------------------------------------------------------------------------------------------------------------------|--------------------------------------------------------------------------------------------------------------------------------------------------------------|-----------------------------------------------|-------------------------------------------------------------------------------------------------------------------------------|-------------------------------------------------------------------------------------------------------------------------------------------------------------------------------------------------------------------------------------------------------------------------|
| CIDRa1.5b<br>(CIDRα1.5b)            | ACGATACATAGACTGGAAATACG<br>ATTGGGAAWATAAACTTAAGACCTG<br>TGGATACTACAGATTGGGATCGTA                                                                                           | AACCCATTGTTCAAAACATTTACA<br>AACCCATTATCAAAACACGTACA<br>AACCCATTATCAAAACACATACA                                                                               | 110 (98-113)                                  | 119/124 (96%)                                                                                                                 | 114/114 (100%)<br>                                                                                                                                                                   |
| CIDRa1.5                            | Comment:<br>A summarised transcript level for CIDRα1.5 (CIDRa1.5a+CIDRa1.5b). There is no overlap between targeted sequences.                                              |                                                                                                                                                              |                                               |                                                                                                                               |                                                                                                                                                                                                                                                                         |
| CIDRa1.6a<br>(CIDRα1.6a)            | AAACTATCAAATATGGCAATGCT<br>AAACTATGAAAAATGGCAATGCT                                                                                                                         | CAATTTGTAAGTTCGTTTTTCCA<br>ATTCGTAAGATCGTCTTTCCA                                                                                                             | 180 (178-181)                                 | 54/54 (100%)                                                                                                                  | 54/56 (96%)<br>                                                                                                                                                                      |
| ↑ Storm et al.                      |                                                                                                                                                                            |                                                                                                                                                              |                                               |                                                                                                                               |                                                                                                                                                                                                                                                                         |
| CIDRa1.6b<br>(CIDRα1.6b)            | ATAATACTAATGTSACGGATTGT                                                                                                                                                    | CAGTTTCTTTATACTATCCCATTC<br>ACATCCTTTATACTACCCCATTC<br>AATTCCTTTATACTCTCCCATTC                                                                               | 107 (104-107)                                 | 81/81 (100%)                                                                                                                  | 81/112 (72%)<br>[28% of the targeted genes are also targeted by two other primer sets: CIDRa1.4/6a and -1.7]<br>                                                                     |
| CIDRa1.7<br>(CIDRα1.7)              | CGGAAACTATAACGTGGAACGATAA<br>CGGAAACTATAAGTGGAAACGATAA<br>CGGAAACTATAACGTGGAACGATAA<br>GGATACTATAATGTGGAATGATAAA                                                           | TAGTTTCTTTATACTATCCCATTC<br>TAGTTCCTTTATACTATCCCATTC<br>TAGTTTCTTTATACTATCCCATTC<br>TAGTTTCTTTATACTACTCCATTC<br>TAATTCCTTTATATATTCCATTC                      | 148 (145-149)                                 | 277/282 (99%)                                                                                                                 | 277/395 (70%)<br>[unintended targets are all var1 CIDRα1.2]<br>                                                                                                                    |
| CIDRa1.A<br>(CIDRα1 of group A)     | Comment:<br>A summarised transcript level for all group A CIDRα1 domains (CIDRa1.4-7 primers). There is an estimated 2% of genes targeted twice by these primer sets.      |                                                                                                                                                              |                                               |                                                                                                                               |                                                                                                                                                                                                                                                                         |
| CIDRa1.all<br>(All CIDRα1)          | Comment:<br>A summarised transcript level for all CIDRα1 domain primers. There is an estimated 5% of genes targeted twice by these primer sets.                            |                                                                                                                                                              |                                               |                                                                                                                               |                                                                                                                                                                                                                                                                         |
| CIDRd<br>(N-terminal CIDRδ)         | TAAATGTAACCTAGATGTATGGAAC<br>TAAATGTAACCTACATGTATGGAAC<br>TAAATGTAACCTAGACGTATGGAAC<br>TAAATGTTACTTAGATGTATGGAAC<br>TAAATGTAACCTAGATATATGGAAC<br>TAAATGTAAGTTAGATGTATGGAAC | AATACTTTAACCAACGTTTAAATCAATC<br>AATACTTTAACCAACGTTTAAATCAATC<br>AATACTGCAACCAACGTTTAAATCAATC<br>AATGCTCTAACCAACGTTTAAATCAATC<br>AATACATCAACCAACGTTTAAATCAATC | 104 (104-104)                                 | 308/410 (75%)                                                                                                                 | 308/350 (88%)<br>                                                                                                                                                                  |
| CIDRg3.1<br>(CIDRγ3.1)              | TATGTATATGCTGATGAACGTATTAC                                                                                                                                                 | TTCTATCCATTTTTCTAAACATTC                                                                                                                                     | 174 (174-174)                                 | 81/81 (100%)                                                                                                                  | 81/81 (100%)<br>[The N-terminal group A CIDRγ domains (ie. CIDRγ3 domains) are diversified into several small subgroups of which the CIDRγ3.1 is the largest (~20% of CIDRγ3)]<br> |
| CIDRa3.1/2<br>(CIDRα3.1/2)          | AHWWVCAAAAGACRTWCHATRATTT<br>AHWWVCAAAAGACRTTCAATCCT<br>ARAAAGTAAAGGATTATGTWGRTTT                                                                                          | TTTTTGTCTCCAATRTATRGAATC                                                                                                                                     | 80 (80-81)                                    | 1479/1970 (75%)<br>CIDRα2-6: 1536/9142 (17%)                                                                                  | 1479/1536 (96%)<br>CIDRα2-6: 1536/1536 (100%)<br>                                                                                                                                  |

| Primer name<br>(Target domain type)         | Forward primers<br>5'-3'                                                                                                                                           | Reverse primers<br>5'-3'                                                                                                                              | Amplicon size            | Coverage                                                                                                               | Specificity                                                                                                                                            |
|---------------------------------------------|--------------------------------------------------------------------------------------------------------------------------------------------------------------------|-------------------------------------------------------------------------------------------------------------------------------------------------------|--------------------------|------------------------------------------------------------------------------------------------------------------------|--------------------------------------------------------------------------------------------------------------------------------------------------------|
|                                             | Mixed to a final total primer concentration of 20 µM                                                                                                               | Mixed to a final total primer concentration of 20 µM                                                                                                  | Median (Min - Max)<br>bp | Number of sequences amplified with intended domain class / number of sequences with intended domain class (%)          | Number of sequences amplified with intended domain class / number of domain sequences amplified (%)<br><br>Specificity graphic                         |
| DBLa2/1.1/2/4/7<br>(DBLa2/1.1/2/4/7)        | GATTAYGTBCCTCAATTTTTAMGWTGGT                                                                                                                                       | TACAATCATATCCATTAWGACTACAA<br>TCACAATCGCATCCATTATGACTACAA                                                                                             | 145 (145-157)            | 1422/1736 (82%)                                                                                                        | 1422/1489 (82%)<br>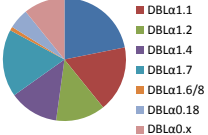                                                 |
| DBLa1.5/6/8<br>(DBLa1.5/6/8)                | GATTAYGTBCCTCAATTTTTAMGWTGGT                                                                                                                                       | TTTTAGTACAATCATAACCATCACCA<br>GATTTGTTTTTTACAATCGTAACCCCTC<br>ACAATCCTCACCATCACCCTACAAT<br>CGTGATATATCTGTTTKAGTACAATC<br>GATCTGTTGTTTACAATCGTAACCCCTC | 157 (144-173)            | 596/812 (73%)                                                                                                          | 596/666 (90%)<br>                                                   |
| DBLa1all<br>(DBLa1.1-8)                     | TTGGGAAATGTRTTTGTACAGCAA<br>TTGGGAAATGTTAGTTATGGCAA<br>TTGGGAAATTTAGTTATGGCAAG<br>TTGGGAACTTATTAGTTATGGCAA<br>TTAGGAAATATATTGGTAGCAGCAA<br>TTAGGAAATATCTGGTACAGCAA | CCTATATCNGCAAACKCKWGC                                                                                                                                 | 116 (116-128)            | 2211/2404 (92%)                                                                                                        | 2211/2211 (100%)<br>                                                |
| DBLb1/3-1<br>(Group A DBLβ1/3, subdomain 3) | TATACAAASAAGCAGAAATTTATGC<br>TACGCAAAAGCAGCAATTGTTGCTA                                                                                                             | TTATAATACCAGGACCRCCATT                                                                                                                                | 52 (50-52)               | N/A<br>(8% of DBLβ3)<br>(25% of DBLβ1 not var1)<br>[95% of ICAM1 binding group A DBLβ defined in Lennartz et al. 2017] | N/A<br>                                                             |
| DBLb1/3-2<br>(Group A DBLβ1/3, subdomain 3) | AACATGCAKAGTCGATATTGCT                                                                                                                                             | CAGTAGAAGTWTARGACECCAT                                                                                                                                | 51 (51-51)               | N/A<br>(5% of DBLβ3)<br>(18% of DBLβ1 not var1)                                                                        | N/A<br>                                                           |
| DBLb5-S1<br>(DBLβ5 subdomain 1)             | AACAAAGTAGCGTATCAAATGCAT<br>AACAAARYRGACAMCWAATGCATVA                                                                                                              | CCTTKTGWTGCATYRSCCYTYAA                                                                                                                               | 92 (89-95)               | 521/1428 (37%)                                                                                                         | 521/661 (79%)<br>[No target overlap with other DBLβ primers]<br>  |
| DC5<br>(DC5 DBLβ domain)                    | GTTGCTCCYMCNTTTTGTAAATGT<br>CCCCCHCCYTTTTGTAAAGTNC<br>TTGCACCCATTTTTGTAAATATGCC                                                                                    | ACCACRTTGGTCGATCTTTGTC<br>CACTCACTATGTTGGTGYCATTITT<br>GCCASCACCTTCHACTCCNACCAC<br>YACAYTWACCACATNTGSGM                                               | 69 (62-83)               | 388/500 (78%)                                                                                                          | 388/388 (100%)<br>[No target overlap with other DBLβ primers]<br> |
| DBLe2<br>(DBLe2)                            | AAAWTTAATWGGTTTGGRAGCAC<br>AATTTTRATWGGTTTAAATGCAYACA                                                                                                              | GACATAATTGTTGYACTCTAGGAGRMA                                                                                                                           | 86 (85-89)               | 335/416 (80%)                                                                                                          | 335/335 (100%)<br>                                                |
| DBLe6<br>(DBLe6)                            | GTTGCATAYAATGAAGTTATTTCTC<br>AAAACRRACCTTATGAATTTGCTTACA<br>ATTTCTTCAATATGYCTAYACTSAAGGA                                                                           | ATCHGTWCCTTTAACTATATCTCCATA<br>ATCTYTACCTTTTACTATATCAGCAAT                                                                                            | 127 (117-135)            | 335/442 (76%)                                                                                                          | 335/387 (87%)<br>                                                 |
| DBLe11<br>(DBLe11)                          | AAAGHATTACAAAAGAYGCATAT<br>CATTACAATATGTCATATAATSAAAG<br>AAATACAGGAATCAGCATACAACGAAG                                                                               | TTCTTTAATAAATYASCATAATCWGA<br>TCAGCATAACTYCTTTTCATATTTTCA                                                                                             | 177 (151-178)            | 287/315 (91%)                                                                                                          | 287/287 (100%)<br>                                                |

| Primer name<br>(Target domain type) | Forward primers<br>5'-3'<br><br>Mixed to a final total primer<br>concentration of 20 µM                                                        | Reverse primers<br>5'-3'<br><br>Mixed to a final total primer<br>concentration of 20 µM | Amplicon size<br><br>Median (Min - Max)<br>bp | Coverage<br><br>Number of sequences<br>amplified with intended<br>domain class / number of<br>sequences with intended<br>domain class (%) | Specificity<br><br>Number of sequences<br>amplified with intended<br>domain class / number of<br>domain sequences<br>amplified (%) | Specificity graphic |
|-------------------------------------|------------------------------------------------------------------------------------------------------------------------------------------------|-----------------------------------------------------------------------------------------|-----------------------------------------------|-------------------------------------------------------------------------------------------------------------------------------------------|------------------------------------------------------------------------------------------------------------------------------------|---------------------|
| DBLe13<br>(DBLe13)                  | CTGTTGCTGCAAATSAAGGATATAAT<br>CTGCTGYTGCAAATGATGCATATAAT                                                                                       | ATAATCRTAAAAACTRTATTTCAATGCAT                                                           | 107 (107-107)                                 | 185/196 (85%)                                                                                                                             | 185/185 (100%)                                                                                                                     |                     |
| DBLe14<br>(DBLe14)                  | TTTAAAYCAAGGAATWCTTTTAGGAA                                                                                                                     | ATATCTSCATARTCAGCAAAACTAT                                                               | 95 (95-101)                                   | 117/137 (85%)                                                                                                                             | 117/193 (61%)                                                                                                                      |                     |
| DBLe_all<br>(DBLe2/6/11/13/14)      | Comment:<br>A summarised transcript level for all DBLe primers. There is no overlap between the primer sets summarised.                        |                                                                                         |                                               |                                                                                                                                           |                                                                                                                                    |                     |
| DBLz2a<br>(DBLz2)                   | CCTCAACGTTTRAGATGGATGAAG                                                                                                                       | ATTTTGCAACATAYTCTCCCCATT                                                                | 50 (50-50)                                    | 64/336 (19%)                                                                                                                              | 64/142 (45%)                                                                                                                       |                     |
| DBLz2b<br>(DBLz2)                   | AGTGACCCTCCTGTGGATGATTA                                                                                                                        | TGCAATAATTTCACTCCATTCCTT                                                                | 73 (73-73)                                    | 114/336 (34%)                                                                                                                             | 114/114 (100%)                                                                                                                     |                     |
| DBLz2c<br>(DBLz2)                   | ATGTRCCTCAAATACTTAGATGGATWA                                                                                                                    | TTCTTGAATTCACAAAAATGTTC                                                                 | 62 (62-62)                                    | 104/336 (31%)                                                                                                                             | 104/104 (100%)                                                                                                                     |                     |
| DBLz2<br>(DBLz2)                    | Comment:<br>A summarised transcript level for DBLz2 domains (DBLz2a+DBLz2b+DBLz2c). There is no overlap between<br>the primer sets summarised. |                                                                                         |                                               | 282/336 (84%)                                                                                                                             | 282/371 (76%)                                                                                                                      |                     |
| DBLz3<br>(DBLz3)                    | AACCTCCTTATGTTGATTACATCCACA<br>ATCCTCCTTATGATGATTATATWCCWCA                                                                                    | TTCTGACCATTCAAGTCATCCATCT                                                               | 59 (59-59)                                    | 90/264 (34%)                                                                                                                              | 90/90 (100%)                                                                                                                       |                     |
| DBLz5<br>(DBLz5)                    | GATTATGATTATATYCCTCAACCTT                                                                                                                      | TTCRCYCCATTCACTTAKCKACKG                                                                | 51 (51-51)                                    | 233/248 (94%)                                                                                                                             | 233/233 (100%)                                                                                                                     |                     |
| DBLz4<br>(DBLz4)                    | AACCTCCTGATTATGATTATATACCT                                                                                                                     | CAATAATTTCACTCCATCTTTCG                                                                 | 67 (67-67)                                    | 281/302 (93%)                                                                                                                             | 281/390 (72%)<br>[55% of targets also<br>targeted by DBLz6]                                                                        |                     |

| Primer name<br>(Target domain type)           | Forward primers<br>5'-3'<br><br>Mixed to a final total primer<br>concentration of 20 µM                                                                                                                                                                     | Reverse primers<br>5'-3'<br><br>Mixed to a final total primer<br>concentration of 20 µM | Amplicon size<br><br>Median (Min - Max)<br>bp | Coverage<br><br>Number of sequences<br>amplified with intended<br>domain class / number of<br>sequences with intended<br>domain class (%) | Specificity<br><br>Number of sequences<br>amplified with intended<br>domain class / number of<br>domain sequences<br>amplified (%)<br><br>Specificity graphic |
|-----------------------------------------------|-------------------------------------------------------------------------------------------------------------------------------------------------------------------------------------------------------------------------------------------------------------|-----------------------------------------------------------------------------------------|-----------------------------------------------|-------------------------------------------------------------------------------------------------------------------------------------------|---------------------------------------------------------------------------------------------------------------------------------------------------------------|
| DBLz6<br>(DBLζ6)                              | CCTGATTATGATTATATWCCYCAACCTT                                                                                                                                                                                                                                | TTCACCTCCATTCTTGCATSMACG                                                                | 54 (54-54)                                    | 324/400 (81%)                                                                                                                             | 324/444 (73%)<br>                                                          |
| DBLz4/6<br>(DBLζ4/6)                          | Comment:<br>Due to the considerable overlap between DBLz4 and DBLz6 primer sets, the transcript level for these domains were analysed using only the data from the primer reporting highest transcript level, <i>i.e.</i> either DBLz4 or the DBLz6 primer. |                                                                                         |                                               |                                                                                                                                           |                                                                                                                                                               |
| DBLz_all<br>(DBLζ)                            | Comment:<br>The summarised transcript level for all DBLζ domains calculated as sum of DBLz2+z3+z4/6. There is no overlap between the primer sets summarised.                                                                                                |                                                                                         |                                               |                                                                                                                                           |                                                                                                                                                               |
| var3<br>(DBLε8 of DC3 aka.<br>DBLζ3-DBLε8)    | AAGAGGATCTACTTAATGCTGCTTTTAG                                                                                                                                                                                                                                | AACTGAACCTCATAGCCTCATATGC                                                               | 99 (99-99)                                    | 164/164 (100%)                                                                                                                            | 164/164 (100%)<br>                                                         |
| ↑ "DBLε8" from Lavstsen et al. PNAS, 2012     |                                                                                                                                                                                                                                                             |                                                                                         |                                               |                                                                                                                                           |                                                                                                                                                               |
| var2csa<br>(DBLpam3<br>aka. DBL3x)            | AATGGGACAAACAAAAACAAAATATG                                                                                                                                                                                                                                  | GCTGATATACATTCAGGATAATTTTC                                                              | 94 (94-94)                                    | 265/265 (100%)                                                                                                                            | 265/265 (100%)<br>                                                       |
| ↑ "T12/T13" from Sander et al. PLoS One, 2009 |                                                                                                                                                                                                                                                             |                                                                                         |                                               |                                                                                                                                           |                                                                                                                                                               |

**Appendix Table S1. In silico characterisation of *var* gene primers.**

Sequences and predicted coverage and specificity of the primer sets, with the targeted domains in a pie chart. Primers are described in detail by Mkumbaye et al and 4 additional primer sets used in our study are indicated with an arrow.

| Target                              |         | Predicted Receptor | Basal binding | ICAM-1 dependent binding |            | EPCR dependent binding |          | CD36 dependent binding |           |
|-------------------------------------|---------|--------------------|---------------|--------------------------|------------|------------------------|----------|------------------------|-----------|
| Domain                              | Group   |                    | HBMEC         | HBMEC                    | HBMEC      | HBMEC                  | HDMEC    | HDMEC                  | HDMEC     |
|                                     |         |                    | CM            | CM                       | UM         | CM                     | CM       | CM                     | UM        |
| <b>CIDR<math>\alpha</math>1.DC8</b> | B/A     | EPCR               |               |                          | -0.60 (18) | 0.59 (11)              |          |                        |           |
| <b>CIDR<math>\alpha</math>1.A</b>   | A       | EPCR               |               |                          |            | 0.61 (11)              |          |                        |           |
| <b>CIDR<math>\alpha</math>1_all</b> | A & B/A | EPCR               |               |                          | -0.58 (17) | 0.54 (10)              |          |                        |           |
| DBL $\zeta$ 4 or DBL $\zeta$ 6      |         |                    |               |                          |            | 0.72 (11)              |          |                        |           |
| DBL $\zeta$ 5                       |         |                    |               |                          |            |                        |          | 0.58 (11)              |           |
| <b>DBL<math>\zeta</math>_all</b>    |         |                    | -0.52 (16)    | -0.65 (13)               |            |                        |          |                        |           |
| DBL $\epsilon$ 6                    |         |                    |               | -0.71 (13)               |            |                        |          |                        |           |
| <b>DBL<math>\epsilon</math>_all</b> |         |                    |               | -0.63 (13)               |            |                        |          |                        | 0.50 (18) |
| DC5                                 | A       | PECAM-1            |               | 0.57 (15)                |            |                        |          |                        |           |
| DBL $\alpha$ 1ALL                   | A       |                    |               |                          |            |                        | 0.71 (9) |                        |           |
| DBL $\alpha$ 2/1.1/1.2/1.4/1.7      | A       |                    |               |                          |            | 0.59 (10)              |          |                        |           |

**Appendix Table S2. Correlation between binding of the clinical isolates to HBMEC or HDMEC and transcript levels of *var* gene domains.**

The correlation coefficient  $r$  and P-value were calculated by the two-tailed non-parametric Spearman test for binding of the clinical isolates to HBMEC or HDMEC and the Tu values of the primer sets. The observations are not corrected for multiple comparisons. The correlation coefficient is shown for basal binding (in absence of inhibitors) and percentage inhibition by rEPCR,  $\alpha$ ICAM-1 or  $\alpha$ CD36 antibody. Group sizes of correlation data are in brackets. The target domains are shown in the first column with specific domain groups in bold. In the matrix, the  $r$ -values are only shown when the P-value  $< 0.1$  and  $r \geq 0.5$  and when at least 25% of the isolates in each group have a Tu value of  $\geq 16$ . The colour indicates the range of the P value; yellow:  $0.05 > P < 0.1$ , green:  $0.01 > P < 0.05$  and red:  $P < 0.01$ . Note that there are positive and negative correlations.

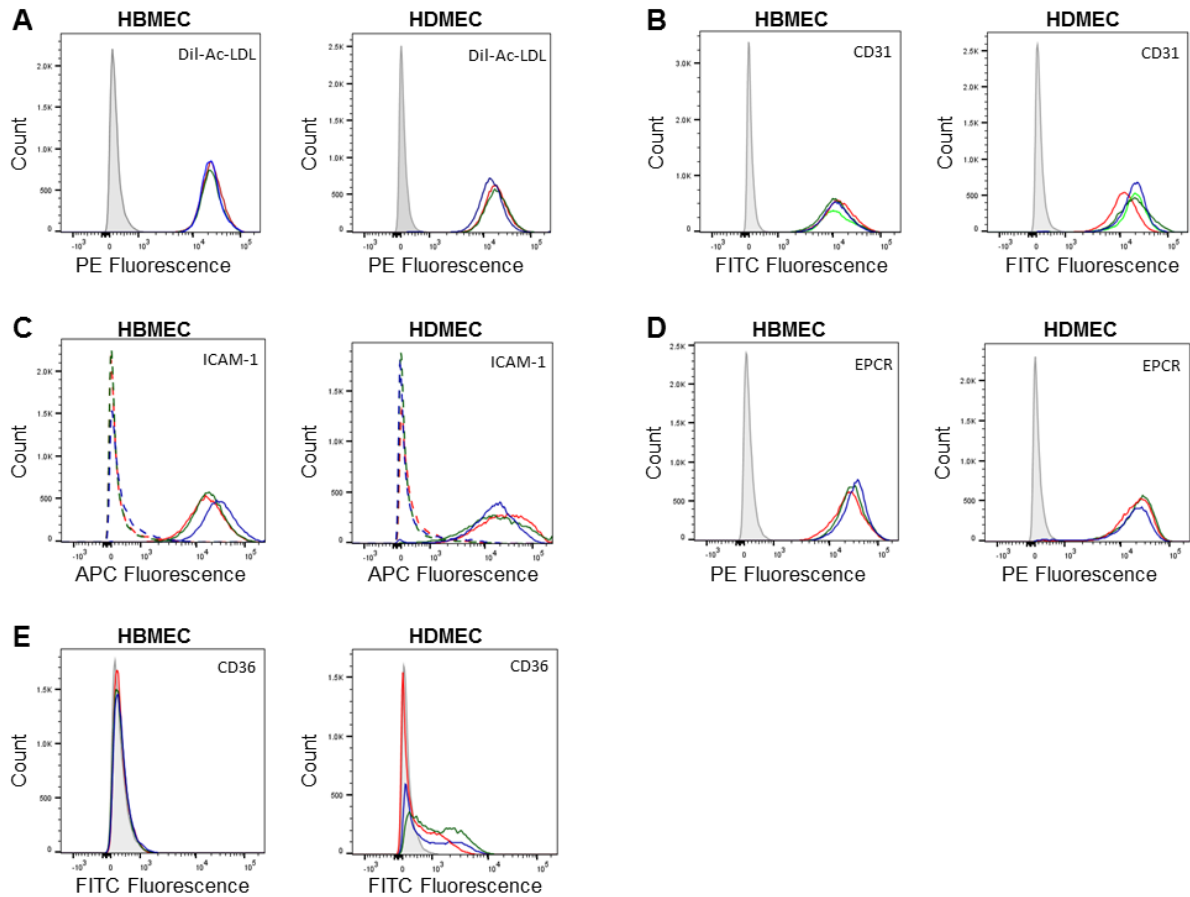

**Appendix Figure S1. Characterisation of HBMEC and HDMEC and expression of ICAM-1, EPCR and CD36 at number of passages.**

- A Characterisation of HBMEC and HDMEC by the uptake of Dil-labelled acetylated low density lipoprotein as measured by flow cytometry. Unlabelled cells are depicted in grey and labelled cells in colour.
- B Levels of CD31 expression on HBMEC and HDMEC was measured by flow cytometry. Unlabelled cells are depicted in grey and labelled cells in colour.
- C Upregulation of ICAM-1 by 10 ng/ml TNF on HBMEC and HDMEC, measured by flow cytometry. The dotted lines represent unstimulated labelled cells and the continuous lines represent the TNF-stimulated labelled cells.
- D Levels of EPCR expression on TNF-stimulated HBMEC and HDMEC was measured by flow cytometry. Unlabelled cells are depicted in grey and labelled cells in colour.
- E Levels of CD36 expression on TNF-stimulated HBMEC and HDMEC was measured by flow cytometry. Unlabelled cells are depicted in grey and labelled cells in colour.

Shown are representative flow cytometry experiments. HBMEC: blue = passage 5, light green = passage 7 (only in B), red = passage 8 and dark green = passage 9. HDMEC: blue = passage 4, red = passage 6 and green = passage 8.



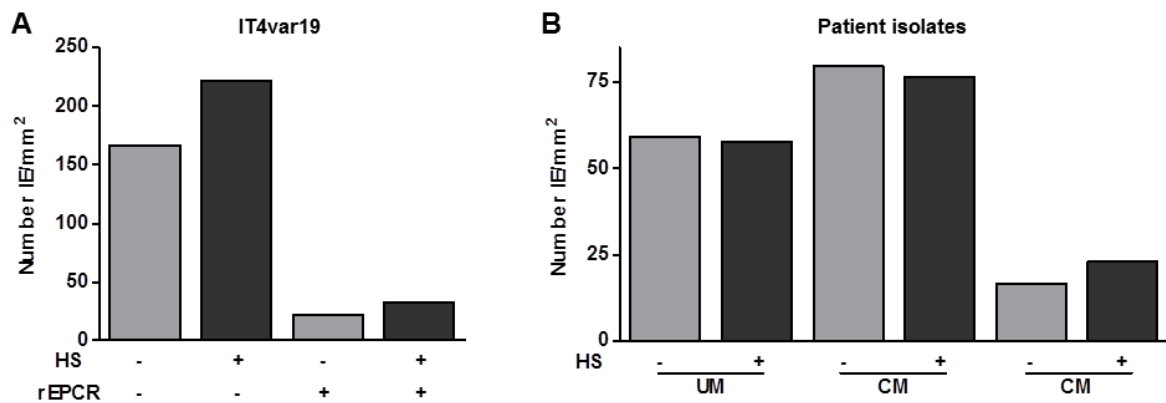

**Appendix Figure S2. Cytoadherence of IT4var19 and three patient isolates to HBMEC in presence of human serum.**

- A Binding of the PfEMP1-DC8 variant IT4var19 to HBMEC was determined under flow conditions without and with 10% human serum (HS) and in the absence and presence of 50  $\mu\text{g/ml}$  rEPCR. Number of IE bound per  $\text{mm}^2$  EC surface was calculated.
- B Binding of 1 UM and 2 CM isolates, which were shown to be mainly EPCR-dependent binders, to HBMEC under flow conditions without and with 10% human serum (HS). Number of IE bound per  $\text{mm}^2$  EC surface was calculated.

Data information: shown are single representative experiments and thus statistical differences cannot be determined.

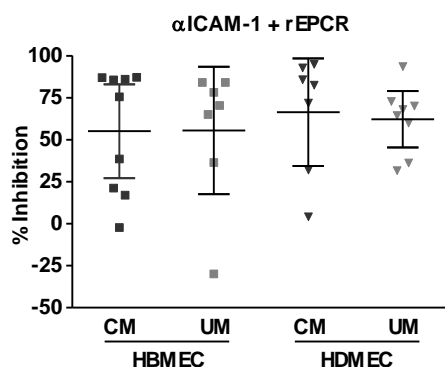

**Appendix Figure S3. Inhibition of cytoadherence of IE from CM and UM cases to HBMEC and HDMEC by combined  $\alpha\text{ICAM-1}$  antibody and rEPCR.**

IE were isolated and binding to HBMEC and HDMEC was determined under flow conditions in the presence of 5  $\mu\text{g/ml}$   $\alpha\text{ICAM-1}$  antibody and 50  $\mu\text{g/ml}$  rEPCR. Number of IE bound per  $\text{mm}^2$  EC surface was measured and percentage inhibition was calculated relatively to binding in the absence of inhibitors. Shown are the mean  $\pm$  95% CI and no significant differences were determined with a two-tailed unpaired t-test.
